# Supplementary material for: A peptide-decorated and curcumin-loaded mesoporous silica nanomedicine for effectively overcoming multidrug resistance in cancer cells
Source: Royal Society of Chemistry journal article supplement (doi:10.1039/c7ra01128h), 2017-01-01
Supplement: c7ra01128h1.pdf [file c7ra01128h1.pdf]

## Electronic Supplementary Information

### **A peptide-decorated and curcumin-loaded mesoporous silica nanomedicine for effectively overcoming multidrug resistance in cancer cell**

Xian Sun,<sup>a†</sup> Yingping Luo,<sup>a†</sup> Liwei Huang,<sup>a</sup> Bo-Yang Yu<sup>a\*</sup> and Jiangwei Tian<sup>a,b\*</sup>

<sup>a</sup>State Key Laboratory of Natural Medicines, Jiangsu Key Laboratory of TCM Evaluation and Translational Research, Department of Complex Prescription of TCM, China Pharmaceutical University, Nanjing 211198, P.R. China. Fax/Tel.: +86 25 86185158; Email: boyangyu59@163.com; jwtian@cpu.edu.cn

<sup>b</sup>College of Chemistry, Chemical Engineering and Materials Science, Shandong Provincial Key Laboratory of Clean Production of Fine Chemicals, Shandong Normal University, 250014, P.R. China

<sup>†</sup>Both authors contributed equally to this work.

### Scheme S1. Preparation of MSN-Pep

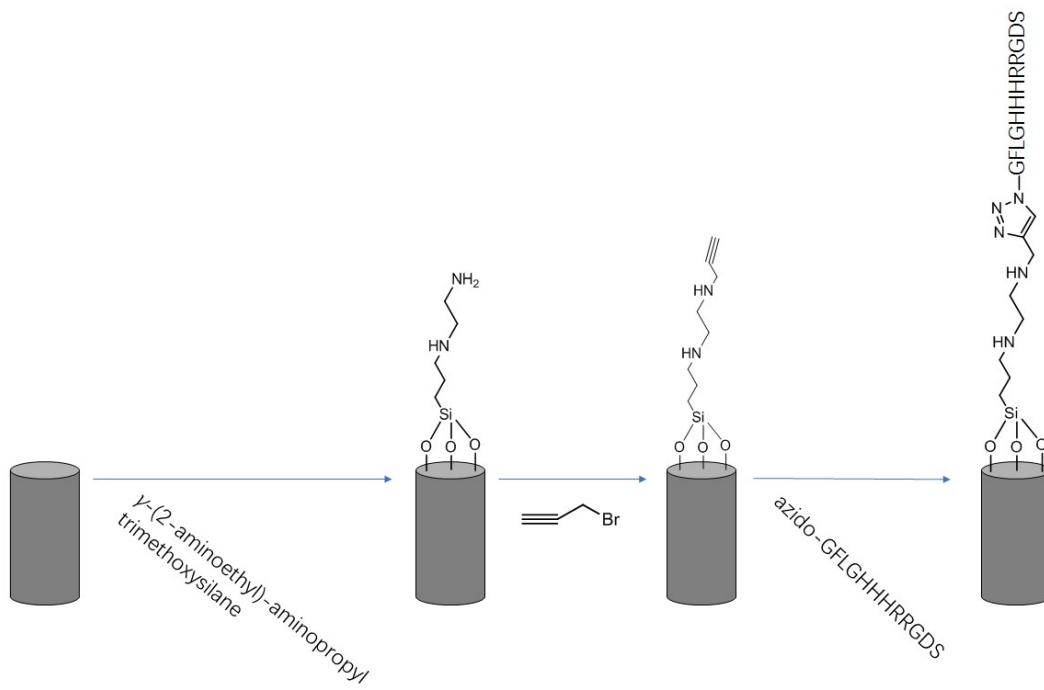

**Table S1.** Zeta potentials of different nanocarriers in PBS

| Sample              | zeta potential (mV) |
|---------------------|---------------------|
| MSN-41              | -18.42              |
| MSN-NH <sub>2</sub> | 21.15               |
| MSN-alkyne          | 2.12                |
| MSN-Pep             | 12.43               |
| DOX/CUR@MSN-Pep     | 12.05               |

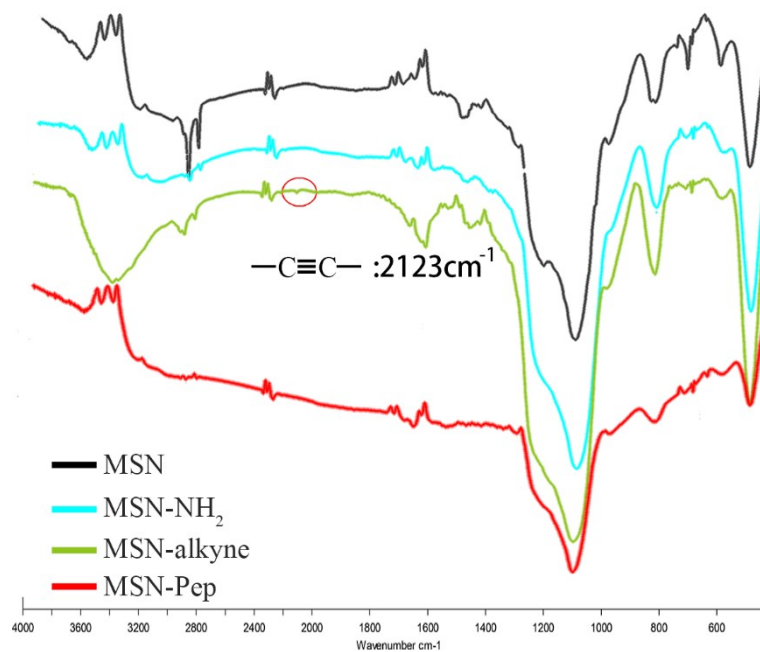

**Figure S1.** FT-IR spectra of MSN, MSNs-NH<sub>2</sub>, MSNs-alkyne, and MSN-Pep.

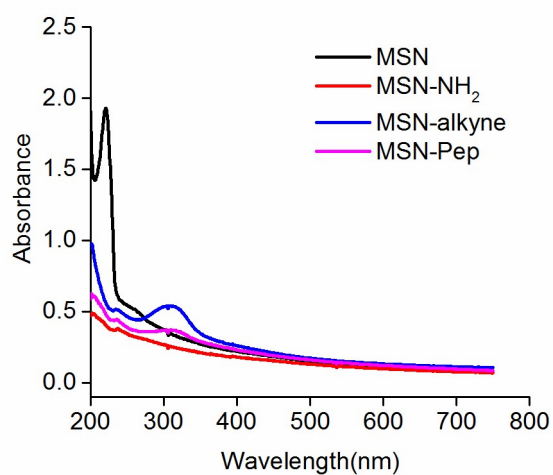

**Figure S2.** UV-VIS absorption spectra of MSNs, MSNs-NH<sub>2</sub>, MSNs-alkyne, and MSN-Pep.

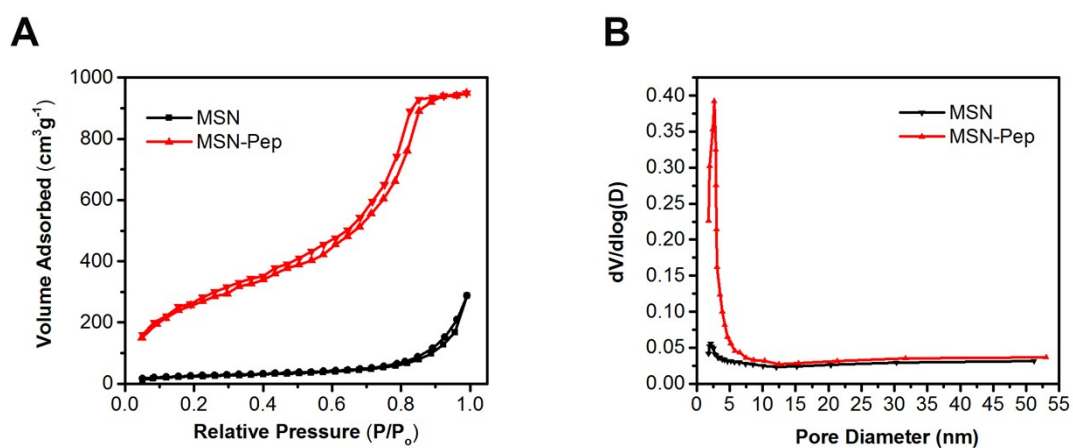

**Figure S3.** BET nitrogen adsorption/desorption isotherms (A) and BJH pore size distribution (B) of MSN and MSN-Pep.

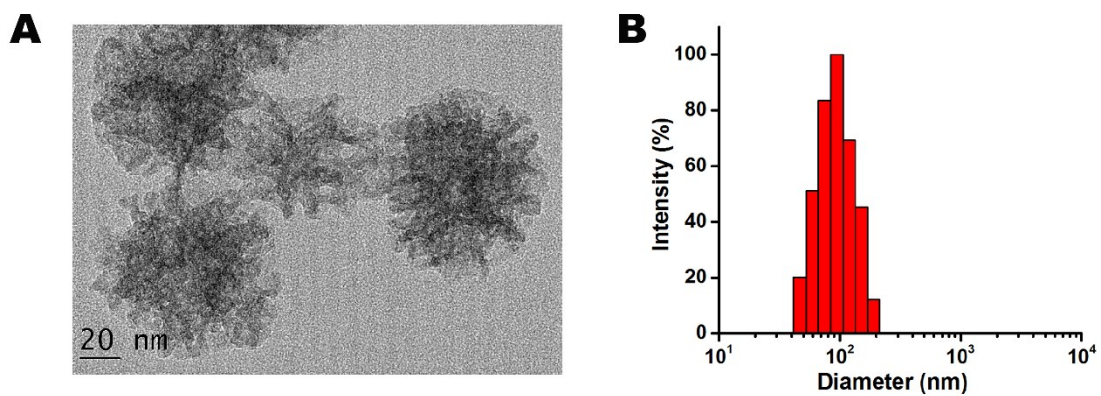

**Figure S4.** (A) TEM image of blank MSN. Scale bar: 20 nm. (B) Size distribution of blank MSN measured by DLS.

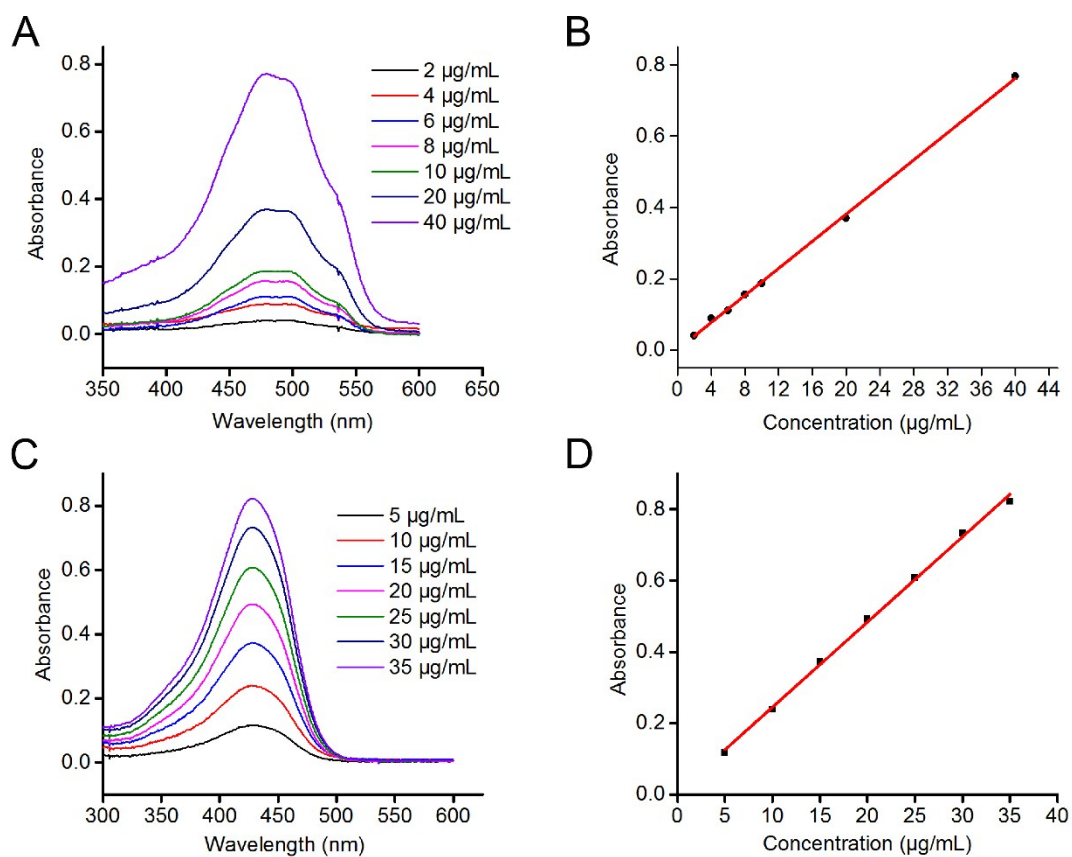

**Figure S5.** (A) The absorption spectra of DOX with different concentrations. (B) The standard curve of DOX absorbance value at 488 nm. The obtained standard curve is  $y=0.01902x+0.00106$  (y: absorbance value at 488 nm; x: concentration of DOX,  $R^2=0.99879$ ). (C) The absorption spectra of CUR with different concentrations. (D) The standard curve of CUR absorbance value at 425 nm. The obtained standard curve is  $y=0.02389x+0.00586$  (y: absorbance value at 425 nm; x: concentration of DOX,  $R^2=0.99767$ ).

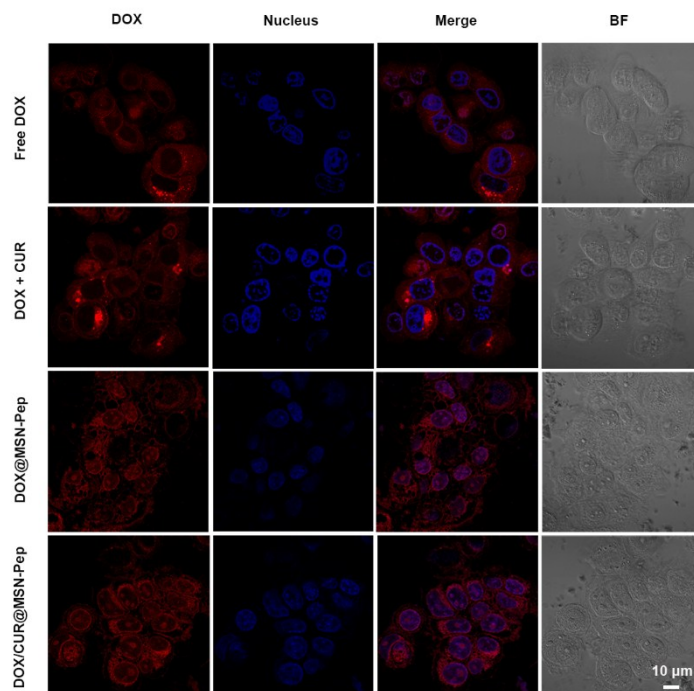

**Figure S6.** Confocal fluorescence images of MCF-7 cells incubated with free DOX, DOX+CUR, DOX@MSN-Pep and DOX/CUR@MSN-Pep for 4 h. Scale bar: 10  $\mu$ m.

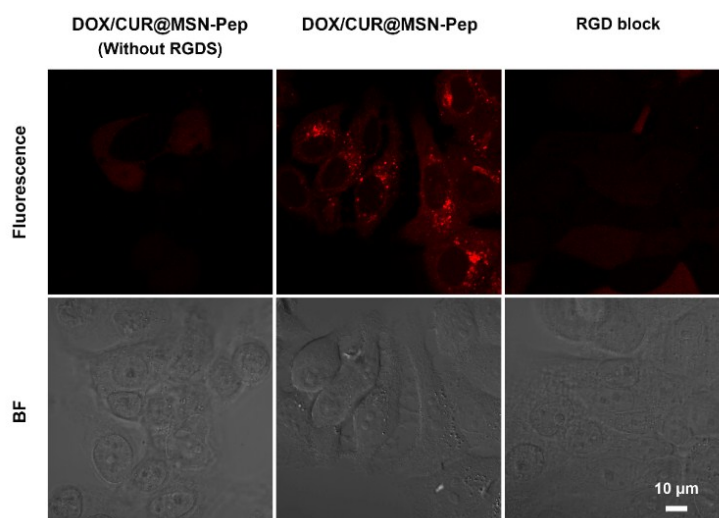

**Figure S7.** Confocal fluorescence images of MCF-7/ADR cells incubated with DOX/CUR@MSN-Pep (without RGDS), DOX/CUR@MSN-Pep for 4 h and the block group pretreated with excessive free RGD, followed by incubation with DOX/CUR@MSN-Pep for 4 h. Scale bar: 10  $\mu$ m.

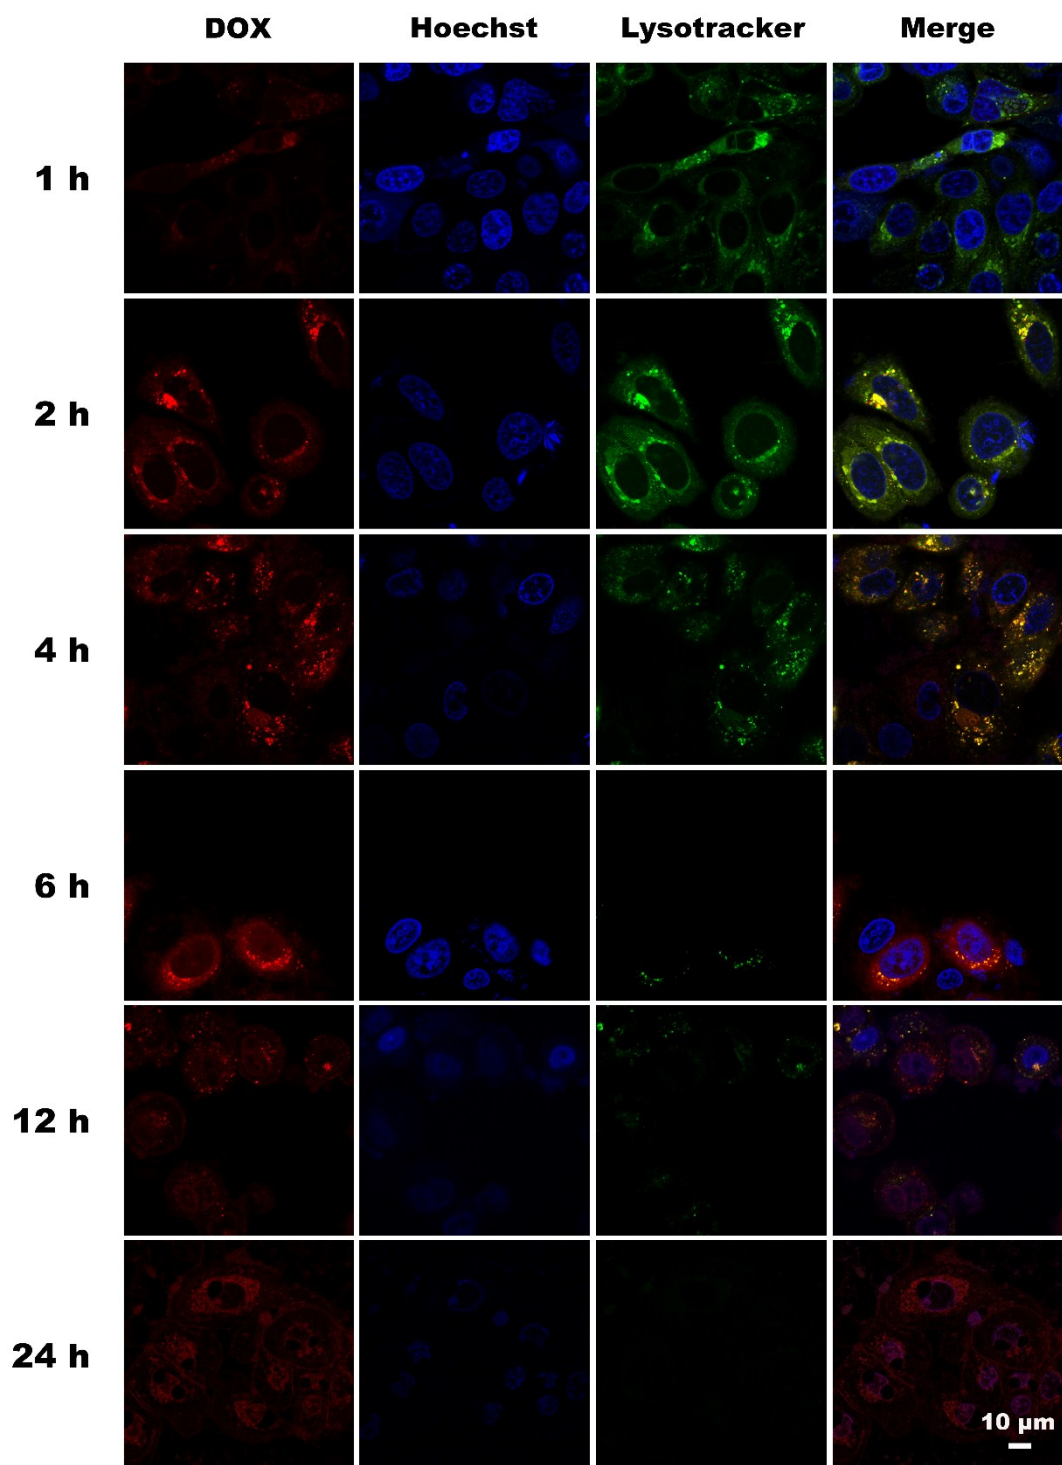

**Figure S8.** Confocal fluorescence images of MCF-7/ADR cells stained with LysoTracker Deep Red (green) and Hoechst 33342 (blue) after cells were incubated DOX/CUR@MSN-Pep for 1, 2, 4, 6, 12 and 24 h, respectively. Scale bar: 10  $\mu\text{m}$ .



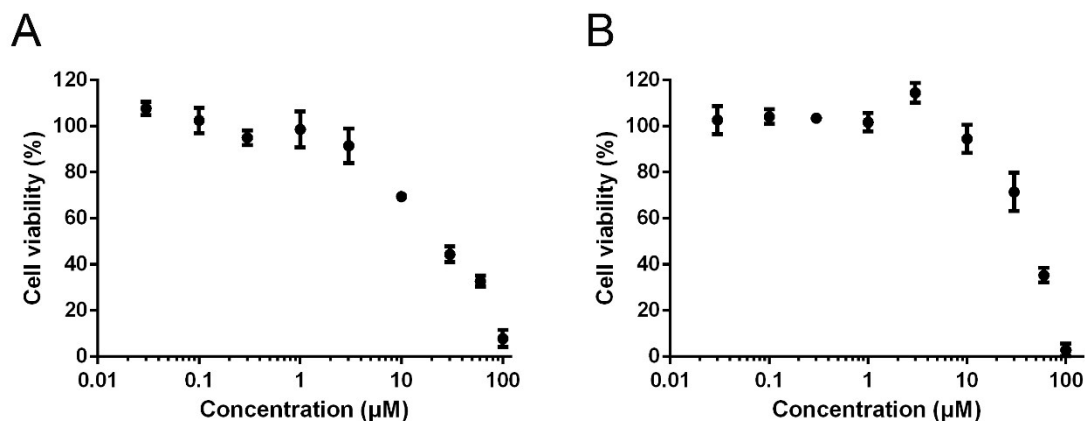

**Figure S9.** MTT assays of MCF-7 (A) and MCF-7/ADR (B) cells after incubation with CUR. The IC<sub>50</sub> values for MCF-7 and MCF-7/ADR cells are measured to be 22.93 µM and 41.68 µM, respectively. Data are means ± SD (n = 5).

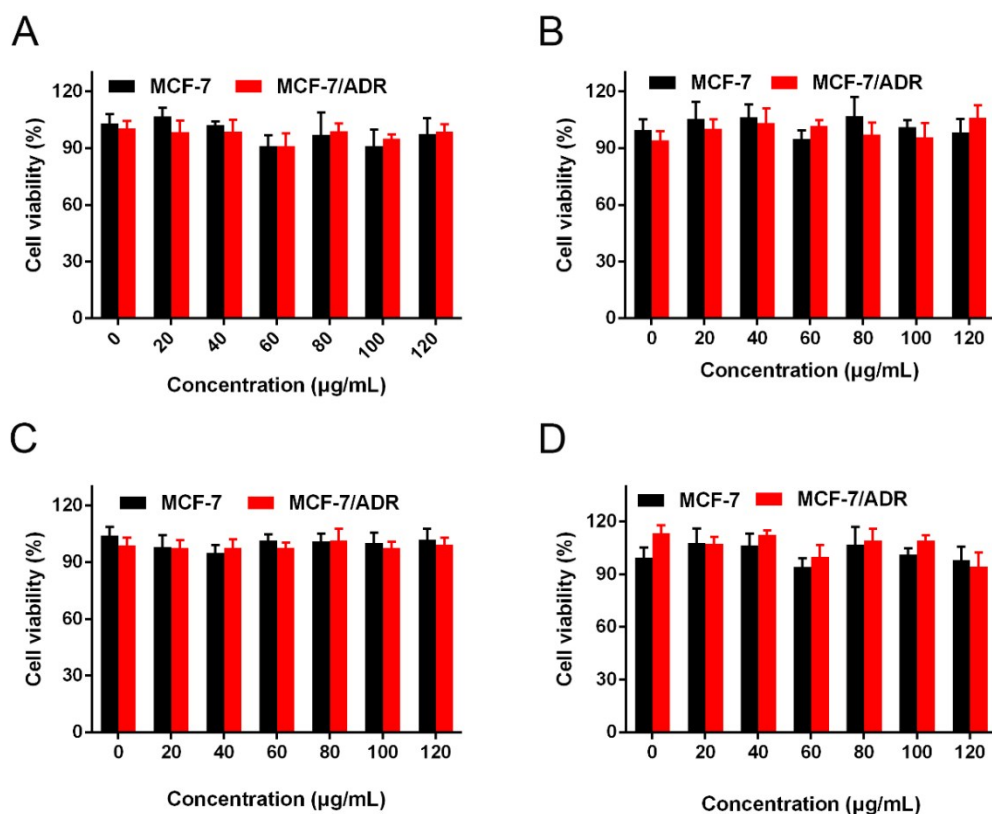

**Figure S10.** MTT assays of MCF-7 and MCF-7/ADR cells after exposure to (A) blank MSN, (B) MSN-NH<sub>2</sub>, (C) MSNs-alkyne and (D) MSN-Pep nanocarrier at various concentrations. Data are means ± SD (n = 5).
